# Supplementary material for: Comparison of Two Alternative Procedures to Obtain Packed Red Blood Cells for β-Thalassemia Major Transfusion Therapy
Source: MDPI journal article supplement (doi:10.3390/biom11111638), 2021-11-04
Supplement: s1 [file s1]

# Supplementary Information

## 1. Supplementary Figures

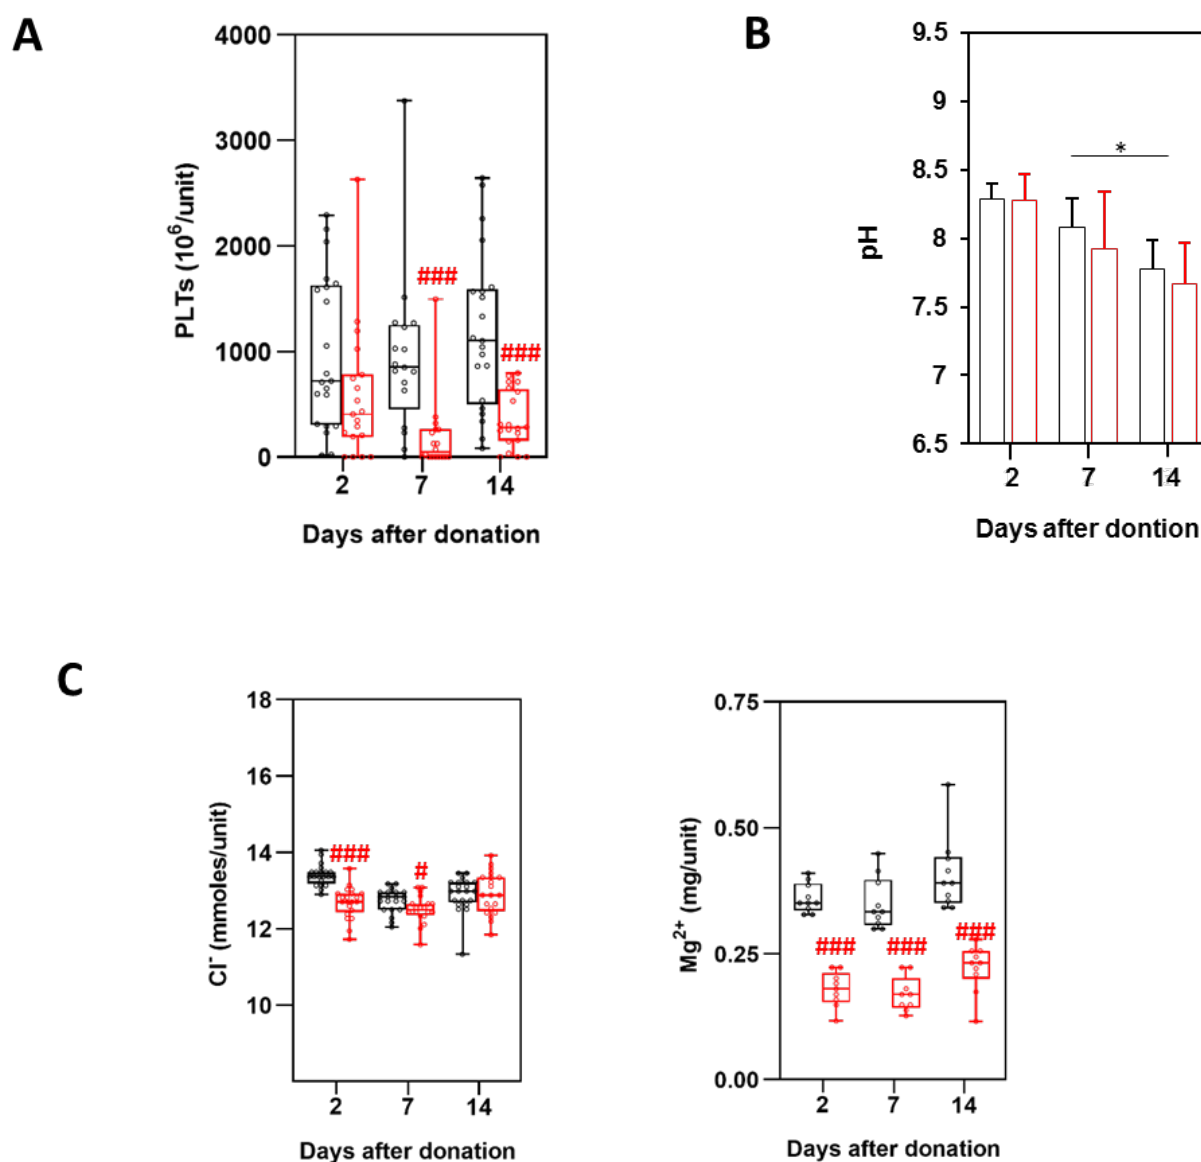

**Figure S1.** Platelets count, pH and electrolytes comparison. (A) Box plots with single values of the number of platelets/unit at 2, 7 and 14 days after storage; (B) Bars of the pH values in the supernatants. Between 12 and 15 were analyzed for each condition; (C) Box plots with single values of the concentration/unit of  $\text{Cl}^-$  and  $\text{Mg}^{2+}$ . Method 1 is in black, method 2 in red. The boxplots were prepared as described in Figure 2. Red # indicate significant differences between the two methods at the various time points. #  $p < 0.05$  and ###.

## 2. Supplementary Tables

**Table S1.** Main features of donors' whole blood before collection.

| Donor | RBCs ( $\times 10^{12}/L$ ) | Hb (g/dL) | HCT (%) |
|-------|-----------------------------|-----------|---------|
| 1     | 4.7                         | 14.0      | 42.8    |
| 2     | 5.5                         | 16.0      | 47.3    |
| 3     | 5.3                         | 16.1      | 47.6    |
| 4     | 4.9                         | 14.7      | 42.1    |
| 5     | 4.7                         | 15.1      | 44.5    |
| 6     | 5.0                         | 14.6      | 42.4    |
| 7     | 5.4                         | 15.5      | 45.5    |
| 8     | 5.0                         | 14.7      | 42.9    |
| 9     | 4.7                         | 14.8      | 41.9    |
| 10    | 5.1                         | 15.1      | 43.7    |
| 11    | 5.3                         | 15.2      | 45.0    |
| 12    | 5.2                         | 15.3      | 45.4    |
| 13    | 5.0                         | 16.3      | 47.1    |
| 14    | 5.3                         | 15.4      | 43.8    |
| 15    | 4.9                         | 14.2      | 41.2    |
| 16    | 4.9                         | 15.3      | 43.6    |
| 17    | 5.0                         | 14.6      | 42.8    |
| 18    | 5.1                         | 14.5      | 42.2    |
| 19    | 5.2                         | 13.6      | 41.0    |
| 20    | 5.3                         | 15.8      | 44.8    |
| 21    | 5.3                         | 16.8      | 46.9    |
| 22    | 5.0                         | 14.8      | 44.7    |
| 23    | 5.3                         | 15.2      | 44.4    |
| 24    | 5.5                         | 15.0      | 45.1    |
| 25    | 5.4                         | 16.0      | 47.5    |
| 26    | 5.4                         | 16.7      | 46.6    |
| 27    | 5.4                         | 15.6      | 46.7    |
| 28    | 5.5                         | 16.2      | 47.3    |
| 29    | 5.0                         | 14.9      | 44.6    |
| 30    | 6.2                         | 16.1      | 50.7    |
| 31    | 5.3                         | 16.5      | 45.5    |
| 32    | 5.4                         | 15.3      | 46.3    |
| 33    | 5.4                         | 15.9      | 46.5    |
| 34    | 5.3                         | 15.5      | 45.4    |
| 35    | 5.4                         | 15.7      | 46.8    |
| 36    | 5.7                         | 17.5      | 50.7    |
| 37    | 5.9                         | 17.1      | 49.7    |
| 38    | 5.8                         | 17.6      | 50.4    |
| 39    | 5.3                         | 15.5      | 45.3    |
| 40    | 5.4                         | 15.5      | 45.0    |

Table S2. General features of the pooled whole blood before processing.

| n  | Phenotype       | WBC                   | RBCs                  | Hb     | HCT  | MCV  | MCH  | MCHC   | RDW  | PLTs                  | MPV  | Ferritin | Serum   | TIBC  | LIBC  | Transferrin | Transferrin | Na <sup>+</sup> | K <sup>+</sup> | Cl <sup>-</sup> | Mg <sup>2+</sup> | NH <sup>4+</sup> | LDH   |
|----|-----------------|-----------------------|-----------------------|--------|------|------|------|--------|------|-----------------------|------|----------|---------|-------|-------|-------------|-------------|-----------------|----------------|-----------------|------------------|------------------|-------|
|    |                 | (10 <sup>3</sup> /μl) | (10 <sup>6</sup> /μl) | (g/dl) | (%)  | (fl) | (pg) | (g/dl) | (%)  | (10 <sup>3</sup> /μl) | (fl) | (ng/ml)  | Iron    | (%)   | (%)   | saturation  | (mg/dl)     | (mM)            | (mM)           | (mM)            | (mg/dl)          | (μg/dl)          | (U/l) |
|    |                 |                       |                       |        |      |      |      |        |      |                       |      |          | (μg/dl) |       |       | (%)         |             |                 |                |                 |                  |                  |       |
| 1  | A+ CcDeekk      | 4.08                  | 4.47                  | 13.9   | 39.2 | 87.8 | 31   | 35.4   | 11.7 | 92.4                  | 6.4  | 46       | 63      | 238.7 | 175.7 | 26.3        | 188         | 166.7           | 3.5            | 78              | 1.55             | 132              | 346   |
| 2  | A+ CcDEekk      | 5.25                  | 4.42                  | 13.4   | 39.5 | 89.4 | 30.4 | 34     | 13.1 | 162                   | 7.95 | 25       | 125     | 274.3 | 149.3 | 45.5        | 216         | 167             | 4.7            | 79              | 1.56             | 116              | 291   |
| 3  | O+ CcDeekk      | 3.41                  | 4.13                  | 13     | 37.4 | 90.7 | 31.4 | 34.6   | 11.4 | 148                   | 7.64 | 41       | 67      | 264.1 | 197.1 | 25.3        | 208         | 166.6           | 4.9            | 78              | 1.54             | 132              | 279   |
| 4  | A+ CcDeekk      | 4.16                  | 4.46                  | 13.1   | 38.2 | 85.7 | 29.3 | 34.2   | 10.7 | 139                   | 5.24 | 35       | 96      | 276.8 | 180.8 | 34.6        | 218         | 168.8           | 3.3            | 78              | 1.53             | 103              | 335   |
| 5  | AB +<br>CcDeekk | 4.36                  | 4.33                  | 13.3   | 38   | 87.9 | 30.7 | 34.9   | 10.5 | 111                   | 6.99 | 20       | 65      | 242.5 | 177.5 | 26.8        | 191         | 164.4           | 5.3            | 77              | 1.52             | 137              | 340   |
| 6  | O+ CcDeekk      | 5.1                   | 4.52                  | 13.2   | 38.8 | 85.8 | 29.2 | 34     | 10.6 | 161                   | 7.11 | 45       | 56      | 241.3 | 185.3 | 23.2        | 190         | 168.9           | 4.1            | 79              | 1.53             | 114              | 325   |
| 7  | O+ CCDeekk      | 7.6                   | 4.66                  | 13.8   | 40.8 | 87.5 | 29.5 | 33.7   | 12.4 | 184                   | 8.33 | 123      | 86      | 259   | 173   | 33.2        | 204         | 168             | 3.7            | 77              | 1.57             | 122              | 288   |
| 8  | B+ CcDeekk      | 4.97                  | 4.23                  | 13.1   | 38.1 | 90.1 | 30.9 | 34.3   | 13.1 | 108                   | 8.91 | 31       | 88      | 275.5 | 187.5 | 31.9        | 217         | 167.3           | 3.5            | 79              | 1.58             | 98               | 359   |
| 9  | A+ CcDeekk      | 3.38                  | 5.1                   | 14.8   | 45.1 | 88.6 | 29   | 32.7   | 13.1 | 136                   | 8.03 | 80       | 47      | 246.3 | 199.3 | 19          | 194         | 166.6           | 3.4            | 80              | 1.67             | 125              | 309   |
| 10 | A+ CCDeekk      | 5.14                  | 4.82                  | 13.5   | 41.5 | 86.2 | 28.1 | 32.6   | 13.6 | 137                   | 8.05 | 72       | 77      | 242.5 | 165.5 | 31.7        | 191         | 168.3           | 3.3            | 78              | 1.64             | 104              | 296   |
| 11 | A+ CcDeekk      | 5.25                  | 4.36                  | 12.8   | 38.5 | 88.3 | 29.4 | 33.2   | 13.6 | 197                   | 9.6  | 22       | 93      | 298.4 | 205.4 | 31.1        | 235         | 156             | 3.9            | 81              | 1.59             | 190              | 211   |
| 12 | A+ CcDeekk      | 6.24                  | 4.65                  | 13.3   | 40.6 | 87.3 | 28.6 | 32.8   | 13.7 | 170                   | 10.6 | 28       | 75      | 288.2 | 213.2 | 26          | 227         | 157             | 4.3            | 80              | 1.7              | 222              | 245   |
| 13 | A+ CcDeekk      | 4.38                  | 4.48                  | 13.4   | 40.1 | 89.5 | 29.9 | 33.4   | 13.2 | 164                   | 10.9 | 22       | 68      | 304.8 | 236.8 | 22.3        | 240         | 158             | 4.3            | 83              | 1.69             | 167              | 163   |
| 14 | A+ CcDeekk      | 4.11                  | 4.65                  | 13     | 39   | 85.6 | 28   | 32.7   | 13.7 | 151                   | 10.2 | 29       | 97      | 280.6 | 183.6 | 34.5        | 221         | 155             | 4.5            | 78              | 1.55             | 218              | 186   |
| 15 | A+ CcDeekk      | 4.9                   | 4.43                  | 13.3   | 39.2 | 88.5 | 30   | 33.9   | 12.2 | 124                   | 10.7 | 58       | 65      | 259   | 194   | 25          | 204         | 156             | 4.4            | 81              | 1.53             | 215              | 211   |
| 16 | A+ CcDeekk      | 4.69                  | 4.98                  | 14.8   | 44.7 | 89.8 | 29.7 | 33.1   | 13.2 | 103                   | 11   | 47       | 107     | 259   | 152   | 41.3        | 204         | 157             | 4.3            | 81              | 1.62             | 197              | 213   |
| 17 | A+ CcDeekk      | 7.39                  | 4.58                  | 13.2   | 39.7 | 86.7 | 28.8 | 33.2   | 12.9 | 191                   | 10.6 | 44       | 85      | 304.8 | 219.8 | 27.8        | 240         | 157             | 4.7            | 84              | 1.86             | 279              | 225   |
| 18 | A+ CcDeekk      | 5.31                  | 4.58                  | 13.8   | 41   | 89.5 | 30.1 | 33.7   | 12.9 | 189                   | 10.2 | 27       | 90      | 265.4 | 175.4 | 33.9        | 209         | 158             | 4.6            | 82              | 1.57             | 188              | 156   |
| 19 | A+ CcDeekk      | 4.88                  | 4.88                  | 14.1   | 42.6 | 87.3 | 28.9 | 33.1   | 12.6 | 209                   | 10.4 | 24       | 75      | 283.2 | 208.2 | 26.4        | 223         | 159             | 4.5            | 83              | 1.54             | 226              | 197   |
| 20 | A+ CcDeekk      | 4.6                   | 4.46                  | 13     | 38.4 | 86.1 | 29.1 | 33.9   | 13   | 173                   | 10.6 | 31       | 80      | 295.9 | 215.9 | 27          | 233         | 158             | 4.2            | 83              | 1.73             | 184              | 158   |
